# Supplementary material for: Drosophila PDGF/VEGF signaling from muscles to hepatocyte-like cells protects against obesity
Source: eLife. 2020 Oct 27;9:e56969. doi: 10.7554/eLife.56969 (PMC7752135; doi:10.7554/eLife.56969)
Supplement: Supplementary file 4. [file elife-56969-supp4.xlsx]

## Sheet: Sheet1
Oenocyte Specific Starvation reposnse genes. Chaterjee et al.	Updated annotation	oenots>EGFP	oenots>tsc1, tsc2	avg_logFC
CG14125	CG14125	0	0	0
CG7829	CG7829	0	0	0
Gbeta76C	Gbeta76C	0	0	0
CG5107	CG5107	0.43724	0.14044	0.2968
Amy-p	Amy-p	0.329186	0.0444912	0.284694
Eaat2	Eaat2	0.00765972	0.00261905	0.00504067
alphaTry	alphaTry	0.984155	0.711497	0.272658
Gad1	Gad1	0.00800738	0	0.00800738
CG32557	Mco4	0	0.0082567	-0.0082567
CG11910	alrm	0	0	0
Jon65Aiii	Jon65Aiii	0.43553	0.714228	-0.278698
Pepck	Pepck1	0	0	0
CG42613	CG42613	0.0314809	0	0.0314809
Appl	Appl	0.0404505	0.0274936	0.0129569
CG5966	CG5966	0.356575	0.204862	0.151713
igl	igl	0.017916	0.0148133	0.00310265
Nplp1	Nplp1	0.00929668	0	0.00929668
Snap25	Snap25	0.463993	0.335441	0.128553
CG32017	CG32017	0.0744135	0.123657	-0.0492434
CG31221	CG31221	0.111348	0.0809324	0.0304157
cpx	cpx	0.168443	0.207312	-0.0388689
CG10911	CG10911	0.280344	0.265031	0.0153128
Frq2	Frq2	0.0309651	0	0.0309651
CG4781	CG4781	0.0453855	0.0365635	0.00882198
CG8952	CG8952	0.172533	0.149417	0.0231161
CG4577	CG4577	0.0514889	0.028866	0.0226229
Sodh-1	Sodh-1	0.505299	0.624966	-0.119667
Mur29B	Mur29B	0.0571732	0.133769	-0.0765956
spla2	sPLA2	0.13627	0.133518	0.00275198
CG9497	CG9497	0.054394	0.0732498	-0.0188558
CG15255	CG15255	0.151495	0.192449	-0.0409543
ia2	IA-2	0.0437774	0.0855157	-0.0417384
CG7224	Sirup	0.800039	0.760475	0.0395644
CG17352	Culd	0.711582	0.586421	0.125161
cyp12d1-p	Cyp12d1-p	0.167172	0.174526	-0.00735417
LpR2	LpR2	1.14004	0.876222	0.263815
CG14060	Exn	0.370846	0.155543	0.215303
CG9813	CG9813	0.229466	0.10603	0.123436
CG10621	CG10621	0.0297987	0.157075	-0.127276
Cyp6g1	Cyp6g1	0.465829	0.513233	-0.0474039
CG30083	CG30083	0.0398289	0	0.0398289
lectin-28c	lectin-28C	0.600924	0.284577	0.316347
CG2082	CG2082	0.0189004	0.0997946	-0.0808943
gol	gol	0.00563465	0.0488715	-0.0432368
CG1887	dsb	0.0841204	0.0758423	0.00827817
bmm	bmm	0.333399	0.344466	-0.011067
CG14141	CG14141	0	0	0

## Sheet: full gene list
	EGFP	TSC1	avg_logFC
gal4	1.29157	1.32736	-0.0357952
Nep3	0.00644681	0.00501957	0.00142724
CG9570	0.024388	0.179797	-0.155409
Or19b	0	0	0
CG15322	0	0	0
Or19a	0	0	0
karr	0.0431291	0.0335432	0.00958589
fd19B	0	0	0
CG17003	0.03695	0.0217215	0.0152284
CG12655	0.0229561	0.0433411	-0.020385
CG33217	0.698434	0.399462	0.298972
Vps11	0.503996	0.315709	0.188287
RpL10	1.9648	2.32221	-0.35741
G9a	0.958875	0.815283	0.143592
cin	0.250091	0.301589	-0.0514977
CG3777	0.077859	0.0865317	-0.00867279
CG12470	0	0	0
Or1a	0	0	0
y	0	0	0
ac	0	0	0
sc	0	0	0
l(1)sc	0	0	0
ase	0	0	0
CG13373	0.0971597	0.189546	-0.0923866
CG32817	0.261884	0.319171	-0.0572867
CG3176	0.221496	0.146496	0.0749999
CG3156	0.160329	0.379423	-0.219094
CG17778	0.241255	0.101907	0.139348
arg	0.0749307	0.055525	0.0194057
CG17896	0.677668	0.118661	0.559007
CG18273	0.156577	0.126616	0.0299612
Cyp4g1	0	0	0
Pgcl	0	0	0
CG32816	2.39169	2.16933	0.222365
CG13375	0.00943479	0.0416017	-0.0321669
CG3038	0.0363384	0.0160238	0.0203146
Appl	0.0404505	0.0274936	0.0129569
CG13369	0.314247	0.351152	-0.0369041
CG17829	0.139056	0.161447	-0.0223913
Mybbp1A	0.0407087	0.121435	-0.0807258
su(sable)	0.4911	0.338625	0.152474
CG13367	0.250039	0.351946	-0.101907
Roc1a	0.897533	0.919594	-0.022061
CG5254	0.298488	0.450322	-0.151834
CG5273	0.132419	0.180421	-0.0480027
fz3	0.087491	0.161848	-0.0743565
CG16989	0.205618	0.428241	-0.222623
CG14635	0	0.023688	-0.023688
CG13358	0	0.00932025	-0.00932025
CG13359	0	0.0628553	-0.0628553
Rbf	0.132839	0.304559	-0.17172
CG13360	0.437082	0.491218	-0.0541359
RpL22	0.972087	1.86868	-0.896593
CG13361	0	0	0
CG13362	0	0.00280686	-0.00280686
Hmt4-20	1.00889	1.07242	-0.0635254
RpL36	1.63464	2.28071	-0.646071
CG13364	0.503855	0.466834	0.0370215
CG13365	0.401721	0.373898	0.0278222
CG13366	0.629346	0.604882	0.0244645
CG14634	0	0	0
CG11664	0.0175161	0.0379969	-0.0204808
CG11663	0.0170464	0.110311	-0.0932649
MED22	0.434888	0.43578	-0.000892111
CG32815	0.0205801	0.0319245	-0.0113444
TRAM	0	0	0
mus81	0.042374	0.0696217	-0.0272477
CG18823	0.0152879	0.00584963	0.00943825
CG14631	0	0	0
CG3021	0	0	0
CG14629	0.554762	0.555283	-0.000520195
CG14628	0.016552	0.028042	-0.01149
CG3655	0.180738	0.387537	-0.206799
CDC45L	0.0649753	0.115127	-0.0501512
CG11638	0.00486619	0	0.00486619
TfIIA-S-2	0.0554811	0.0503202	0.00516089
CG3690	0.0637204	0.0679811	-0.00426064
CG3699	0.480972	0.378097	0.102875
CG3703	0.0221987	0	0.0221987
CG3704	0.230175	0.441676	-0.211501
CG3706	0.047474	0.0227945	0.0246795
CG3708	0.00706341	0.0108441	-0.00378066
CG3713	0	0	0
CG32814	0	0	0
CG11378	0.154353	0.207694	-0.0533419
CG11379	0.0108909	0.015661	-0.00477012
CG14627	0	0	0
CG14626	0	0.0319702	-0.0319702
CG11380	0	0	0
CG14625	0	0	0
CG11381	0	0	0
CG14624	0	0	0
CG11382	0.00571578	0	0.00571578
CG32812	0.0277229	0.0382694	-0.0105465
fs(1)N	0.00670546	0	0.00670546
Naa30A	0.646617	0.704619	-0.0580023
Tsp2A	0.163409	0.21324	-0.049831
CG11417	0.272759	0.507425	-0.234666
CG14770	0.116473	0.0291356	0.0873369
ssx	0.316577	0.570942	-0.254366
AMPKalpha	0.459181	0.434244	0.0249368
CG32813	0.224919	0.235154	-0.0102344
Rilpl	0.221126	0.455229	-0.234103
Lrpprc2	0.091128	0.0359904	0.0551376
CG14785	0.0605585	0.0838511	-0.0232925
CG3719	0.560255	0.420117	0.140138
png	0.120888	0.0699804	0.0509075
CG12773	0.202479	0.189398	0.0130814
MTPAP	0.0254131	0.0771985	-0.0517854
CG11409	0.513074	0.472339	0.0407355
DAAM	0.451998	0.77458	-0.322581
CG32811	0	0	0
Atf3	1.78985	2.88873	-1.09888
CG11403	0.0632661	0.469538	-0.406272
CG11398	0.121623	0.112397	0.00922644
CG11384	0	0	0
eIF4E7	0.00451989	0.0149994	-0.0104796
CG14777	0.0443256	0.0340734	0.0102522
CG14778	0.131053	0.238928	-0.107875
CG14780	0	0.0183384	-0.0183384
rush	0	0	0
inc	0.554101	0.45886	0.0952403
dor	0.0901445	0.0327196	0.0574249
hfw	0.253884	0.392852	-0.138968
CG14797	0.0165345	0.0590224	-0.042488
b6	0	0.0357529	-0.0357529
Scgdelta	0.0829028	0.0257999	0.0571029
CG3795	0	0	0
a6	0.0561984	0.131083	-0.0748842
CG3740	0.0551288	0.227247	-0.172118
Mur2B	2.08956	3.24406	-1.1545
CG14795	0.0200959	0.0274752	-0.00737925
sta	1.39725	2.31106	-0.913807
Rab27	0	0	0
CG32808	0.0170813	0	0.0170813
O-fut2	0.136059	0.224145	-0.088086
CG14787	0.021502	0.0708559	-0.0493539
CG32806	0	0	0
MED18	0.416445	0.27778	0.138665
CG14803	0.153558	0.135357	0.018201
Vps26	0.335443	0.420955	-0.0855126
CG14805	0.415395	0.520453	-0.105058
CG14806	0.488337	0.473245	0.0150924
mRpL16	0.411624	0.412605	-0.000980924
mip130	0.306324	0.39878	-0.0924564
Rbcn-3B	0	0	0
Ocrl	0.142613	0.255511	-0.112898
CG11596	0.216784	0.238959	-0.0221747
CG3587	0.126973	0.248599	-0.121626
CG4194	0	0	0
Rtca	0.111901	0.0757738	0.0361274
CG4045	0.199	0.415224	-0.216224
CG4199	0.26501	0.407615	-0.142606
CG14054	0.00751471	0	0.00751471
CG4281	0.174605	0.222199	-0.0475942
Sik2	0.0198461	0.115378	-0.0955318
moody	0.337008	0.38302	-0.0460121
CG4325	0.13639	0.123874	0.0125164
Actn	0.334774	0.375229	-0.0404557
usp	0	0	0
PIG-K	0.370046	0.357483	0.0125626
CG3857	0.0741238	0.0683295	0.00579428
eIF2Bepsilon	0.254876	0.413905	-0.159029
Edem1	0.186894	0.129989	0.0569053
CG32801	0.535404	0.0211484	0.514256
trr	0.0652597	0.0840163	-0.0187566
CG14818	0.230226	0.259933	-0.0297068
CG14817	0.283823	0.179944	0.103879
Pgam5	0.154335	0.359603	-0.205269
Pex5	0.610065	0.758297	-0.148233
CG14814	0	0.0443239	-0.0443239
deltaCOP	0.456971	0.467296	-0.0103255
CG14812	0.308979	0.264845	0.0441336
CG14811	0.00845509	0.01051	-0.00205486
CG4025	0.217274	0.328874	-0.1116
Unc-76	0.368481	0.312676	0.0558055
csw	0.602397	1.74876	-1.14636
D2hgdh	0.507665	0.519528	-0.0118629
Pgd	1.46085	0.388446	1.07241
CG3630	0.186945	0.118259	0.0686862
ND-B14.5A	0.461642	0.324652	0.13699
Cyp4d2	0.270068	0.263155	0.00691376
Cyp4ae1	0.0339982	0	0.0339982
pn	0.0980852	0.0901791	0.00790606
CG17776	0.218823	0.324623	-0.1058
CG17777	0	0.00444491	-0.00444491
CG3457	0	0	0
Mct1	1.52443	0.884421	0.640012
CG14052	0.0348248	0.00696769	0.0278571
pcx	0.0582601	0.0654547	-0.00719455
fs(1)K10	0.0390944	0.0402051	-0.00111068
Or2a	0.0111197	0.0962383	-0.0851187
CG3071	0.120432	0.187915	-0.0674833
CG2854	0	0	0
Raf	0.212521	0.282473	-0.0699518
CG2841	0.146512	0.237881	-0.0913693
mRpL14	0.33505	0.363614	-0.0285635
Ilp6	0.272392	0.937862	-0.66547
CG14050	0.0369629	0.10505	-0.0680875
CG2865	0.973426	1.3622	-0.38877
CG2918	0.470185	0.720791	-0.250606
CG2924	0.872593	0.814913	0.05768
temp	0.0824262	0.145512	-0.0630859
CG3078	0	0	0
CG3191	0.326604	0.368463	-0.0418581
crn	0.243004	0.350195	-0.107191
kz	0.107991	0.14729	-0.0392991
Vinc	0.252699	0.255858	-0.00315892
FarO	2.65069	1.06426	1.58643
CG14053	0.102492	0.0910441	0.0114483
Nmd3	0.226227	0.289985	-0.063758
Cyp4d14	0.151322	0.0793478	0.0719741
Cyp4d1	0.050039	0.0631271	-0.0130882
wapl	0.448748	0.503663	-0.0549157
bcn92	0.727278	0.869988	-0.14271
ph-p	0.859605	0.570417	0.289187
ph-d	0.110419	0.142747	-0.0323286
CG16903	0.192106	0.408941	-0.216836
AANATL7	0.0391118	0.0644028	-0.0252911
wds	0.104041	0.188993	-0.0849521
egh	1.58604	2.03493	-0.448892
Seipin	0.293749	0.298689	-0.00493994
brv3	0.0136814	0.00734265	0.00633872
Tsp3A	0.252705	0.362067	-0.109362
eIF3g1	0.491352	0.580454	-0.089102
Smyd3	0.203229	0.116617	0.0866118
Klp3A	0.00209946	0.0339625	-0.0318631
CG13760	0.137797	0.0765558	0.0612408
Vha36-3	0.0952728	0.151486	-0.0562132
boi	0.0730394	0.0730672	-2.78318e-05
tko	0.384726	0.520376	-0.135651
gt	0.084114	0.0536107	0.0305033
CG32797	0	0	0
CG12496	0	0	0
sgg	2.06661	2.00609	0.0605211
per	0.0599228	0.0374882	0.0224346
CG2662	0.0946777	0.179409	-0.084731
eIF2Bbeta	0.250834	0.334513	-0.083679
CG2681	0.0492008	0.0702736	-0.0210728
CG2694	0.133234	0.120429	0.0128056
fs(1)Yb	0.0352653	0.0316148	0.00365051
fs(1)Ya	0.013285	0.00903802	0.00424694
dwg	0.153466	0.301661	-0.148194
CG2712	0.0679848	0.0758608	-0.00787593
CG12498	0	0	0
w	0.255374	0.390481	-0.135107
CG32795	0.809712	0.303778	0.505933
Syx4	0.264437	0.536301	-0.271864
crm	0.05018	0.0424867	0.0076933
CG2701	0.410608	0.435737	-0.0251291
CG2685	0.0956358	0.200191	-0.104556
CG2680	0.106327	0.153101	-0.0467733
Ugalt	0.140948	0.117965	0.0229833
Spg7	0.336884	0.409428	-0.072544
dyw	0.137044	0.0463531	0.0906907
CG2652	0	0.0365082	-0.0365082
HLH3B	0	0.0168106	-0.0168106
N	0.384626	0.320474	0.0641517
CG3939	0.354805	0.380057	-0.0252516
dnc	1.67329	1.3597	0.313587
ng1	0	0	0
Sgs4	0	0	0
CG10801	0	0	0
CG12206	0.826994	1.41391	-0.586914
CG16781	0.00276962	0.0138866	-0.011117
CG16782	0.0721282	0.193319	-0.121191
CG14269	0	0	0
CG12535	0.648396	1.45183	-0.80343
CG10793	0.0201466	0.00510543	0.0150412
Pig1	0	0	0
ng4	0	0	0
ng3	0	0	0
ng2	0	0	0
CG14265	0	0	0
Fcp3C	0.0270816	0	0.0270816
CG18508	0.530589	0.351359	0.17923
CG3526	0	0	0
CG32793	0	0	0
CG3592	0	0	0
CG3598	0	0	0
CG14420	0	0	0
CG14421	0	0	0
CG14422	0	0	0
CG14423	0	0	0
CG17959	0	0	0
CG3603	0	0	0
kirre	0.886166	1.09625	-0.210083
CG4116	0	0	0
rst	0.0467315	0.0588037	-0.0120722
CG14424	0	0	0
CG14419	0	0	0
CG14418	0.0323298	0.0154858	0.0168439
CG14417	0	0	0
CG14416	0	0	0
CG10802	0.231951	0.664146	-0.432195
CG10803	0.588032	0.844249	-0.256217
CG13021	0.0239214	0.0390204	-0.015099
ppk8	0.0241393	0.110328	-0.0861887
Ilp7	0	0.0157	-0.0157
Mnt	1.3511	1.13932	0.211784
Rala	0.883466	1.96604	-1.08258
Parg	0.135881	0.242687	-0.106806
CG2875	0.0650298	0.0364673	0.0285625
DIP-alpha	4.24728	4.56049	-0.313204
Gas8	0.112874	0.0749006	0.0379734
CG14270	0.127233	0.259412	-0.132179
CG10804	0.086684	0.208088	-0.121404
CG2930	0.100221	0.112999	-0.0127787
CG15239	0.016283	0.0622163	-0.0459333
Glos	0.0719844	0.0833992	-0.0114147
Gem4b	0.0111197	0.00784396	0.00327572
Gem4c	0	0	0
Vap33	0.780621	0.71544	0.0651819
CG6414	0	0	0
CG6428	0.458864	0.736015	-0.277151
lva	0.274059	0.240517	0.0335417
CG2938	0.175819	0.170581	0.00523763
CG15375	0.0168986	0.0321561	-0.0152575
brn	0.0873731	0.0959877	-0.00861461
cib	0.268997	0.195985	0.0730122
dgt4	0.0970616	0.160847	-0.0637853
tyf	1.74444	1.71003	0.0344052
GlcAT-I	0.0897658	0.122849	-0.033083
CG15570	0	0	0
CG12691	0.00808569	0.0389894	-0.0309037
CG15572	0.0072077	0.0258631	-0.0186554
CG3626	0.213874	0.302971	-0.0890964
CG12688	0	0	0
CG12693	0.0032451	0.0451304	-0.0418853
mRpL33	0.33728	0.227534	0.109746
mei-9	0.0336668	0.0217827	0.0118841
CG15579	0.0535081	0.12397	-0.0704618
CG12692	0	0	0
CG15578	0.0223322	0.0655291	-0.0431969
CG15577	0.0239794	0.215546	-0.191567
CG15576	0.0202693	0.0601016	-0.0398322
Muc4B	0	0.00979833	-0.00979833
Femcoat	0	0	0
CG15571	0	0	0
Fas2	1.07608	0.556746	0.519332
Tip60	0.394018	0.246755	0.147263
Nsun2	0.113886	0.246605	-0.132719
Xpac	0.100104	0.159198	-0.0590941
CG6379	0.0826834	0.176861	-0.0941779
bi	0.224917	0.215447	0.00946986
CG3556	0	0.0123596	-0.0123596
CHOp24	0.293614	0.214715	0.0788991
CG3568	0.201599	0.29524	-0.0936409
CG15912	0.193817	0.186012	0.00780447
CG3527	0.276801	0.340751	-0.0639499
CG3546	0	0	0
Pp2C1	0.652132	0.658719	-0.00658668
CG11444	0.373318	0.530251	-0.156933
CG11436	0.094664	0.118325	-0.0236613
Usf	0.383673	0.452952	-0.069279
rb	0.469128	0.259679	0.209449
ctp	2.02972	4.46529	-2.43557
Pdha	0.404677	0.381755	0.0229219
CG7024	0.013585	0.0430658	-0.0294808
CG6978	0	0	0
CG12682	0	0.0227462	-0.0227462
boil	0	0	0
CG6927	0	0	0
CG32772	0.9123	0.808416	0.103884
CG6903	0.541635	0.281875	0.259761
Ptp4E	0.620188	0.82969	-0.209503
CG12680	0.00250327	0.018762	-0.0162587
CG15468	0.0191005	0.00989989	0.00920056
CG2861	0.0158927	0.0158434	4.93159e-05
CG15471	0	0.0458233	-0.0458233
CG2871	0.0181643	0.0378401	-0.0196758
Klf15	0.00394688	0	0.00394688
CG15472	0.0157619	0.00436767	0.0113942
Rpn13R	0	0	0
CG15465	0	0	0
snf	0.40655	0.459592	-0.0530415
dhd	0	0	0
CG4198	0	0.0207197	-0.0207197
Sas10	0.132802	0.254668	-0.121865
Rnp4F	0.182026	0.231979	-0.0499527
CG15930	0.0097836	0	0.0097836
TrxT	0.05066	0.137587	-0.0869275
CG17764	0.0112776	0.0206076	-0.00932998
CG3323	0.0201062	0.0364758	-0.0163696
CG5062	0	0.0058211	-0.0058211
CG32767	1.4256	1.2063	0.219302
XRCC1	0.180318	0.348951	-0.168633
CanB	0	0	0
SK	0.0723777	0.0652263	0.00715134
Usp16-45	0.363334	0.582527	-0.219193
CG16756	0.466847	0.535255	-0.0684082
CG15784	0.387909	1.97865	-1.59074
SPR	0.120665	0.0486408	0.0720238
CG4151	0	0	0
CG12730	0.336092	0.333203	0.00288939
l(1)G0045	0.0381323	0.0866803	-0.048548
Mlc-c	0.634168	1.11503	-0.480863
RhoGAP5A	0.119737	0.165626	-0.0458887
CG32762	0	0	0
frma	0.0772475	0.131698	-0.0544502
NAAT1	0.101816	0.13913	-0.0373146
CG3309	0.0525607	0.0802917	-0.027731
CG4119	0.161795	0.187213	-0.0254181
RpL35	1.36877	1.91026	-0.541498
Gr5a	0	0	0
cv	0.128591	0.108539	0.0200522
AdamTS-B	0.0213086	0.00862972	0.0126789
CG15773	0	0.0247666	-0.0247666
CG4078	0.0669059	0.0216037	0.0453022
CG15772	0.0998066	0.202288	-0.102481
CG15771	0.49677	0.29333	0.20344
CG15767	0	0.00348991	-0.00348991
CG12239	0	0	0
Cpr5C	0	0	0
Prosbeta2R1	0.0356236	0.0264028	0.00922079
CG15765	0.0458094	0.14498	-0.0991706
CG12729	0	0.0211003	-0.0211003
CG15764	0.0248604	0.0590362	-0.0341758
CG16721	0.302947	0.299187	0.00375964
CG4020	0.9733	1.19339	-0.220092
CG12236	0.315521	0.22239	0.0931311
Shmt	0.3438	0.293027	0.0507728
Usp30	0.287205	0.376448	-0.0892436
mof	0.174307	0.21543	-0.0411229
GAA1	0.190725	0.314487	-0.123762
AgmNAT	0.0821001	0.129669	-0.0475692
CG3108	0	0	0
CG3097	0.282093	0.324308	-0.0422153
MAPk-Ak2	0.741883	0.696718	0.0451655
lin-52	0.17435	0.22923	-0.0548792
IntS6	0.689327	0.55047	0.138857
Snx27	0.327398	0.255103	0.0722957
CG33080	0.298663	0.180785	0.117878
CG3149	0.152971	0.198912	-0.0459419
PGAP1	0.0629027	0.11728	-0.054377
Tre1	0.0627897	0.147749	-0.0849593
Rab18	0.374512	0.720789	-0.346277
Sirt4	0.565615	0.512016	0.0535992
CG3726	0.891934	0.668428	0.223506
CG12728	0.0958254	0.236155	-0.14033
CG32756	0.0860159	0.15898	-0.072964
CG6041	0.0958404	0.0728399	0.0230004
CG32755	0.0110809	0.00850674	0.00257414
CG6048	0.00204142	0	0.00204142
CG6067	0.398096	0.325022	0.073074
Grip	0.124441	0.0428909	0.08155
CG5966	0.356575	0.204862	0.151713
MCTS1	0.476243	0.474262	0.00198131
CG5937	0	0.060654	-0.060654
CG5921	0.0484021	0.0463717	0.00203045
Nep1	0.0284075	0.0222157	0.00619186
Efr	0.352502	0.27845	0.0740517
sqh	0.211394	0.279352	-0.0679583
Btnd	0	0	0
vanin-like	0.0109644	0.0406357	-0.0296712
CG32751	0	0.0697065	-0.0697065
CG32750	0.0308261	0.0115245	0.0193016
Mipp2	0.0216336	0.0948349	-0.0732013
raptor	0.0192638	0.044002	-0.0247382
CG4660	0.0416398	0.0499794	-0.00833963
CG4666	2.45135	2.12928	0.322068
Tsp5D	0.0110041	0.108561	-0.0975568
rux	0.107043	0.17794	-0.0708971
mab-21	0.0343621	0.210419	-0.176057
CG4766	0.00815125	0	0.00815125
fs(1)M3	0	0	0
CG14445	0.0370375	0.0300858	0.00695169
Spx	0.0811762	0.182349	-0.101173
CG3781	0.24929	0.362889	-0.1136
Spt6	0.266955	0.347355	-0.0804001
wuho	0.400029	0.491286	-0.0912571
mldr	0.0660132	0.0810161	-0.0150029
CG3815	0.144815	0.359242	-0.214427
CG3823	0.0115232	0.053532	-0.0420088
CG15894	0	0.0234147	-0.0234147
CG3842	0.257192	0.463645	-0.206453
CG3847	0.186782	0.371255	-0.184473
CG3918	0.272023	0.254019	0.0180041
Spat	0.250118	0.315797	-0.0656788
dx	0.0992752	0.179203	-0.0799276
RpL7A	1.28027	1.93144	-0.651165
CG3342	0.116879	0.172404	-0.0555253
PpV	0.161331	0.152041	0.0092902
swa	0.00744425	0.0196183	-0.012174
ND-B16.6	0.733924	0.595132	0.138792
CG12219	0.0851269	0.104469	-0.0193421
Rpt4	0.952252	1.05	-0.0977483
Top3beta	0.333537	0.644363	-0.310827
Lsp1beta	0.0899339	0.055027	0.0349068
GluRIIC	0.0122717	0	0.0122717
CG15824	0.00792742	0	0.00792742
dbe	0.270824	0.397193	-0.126369
aru	0.108497	0.203573	-0.0950762
CG4291	0.149323	0.240888	-0.0915646
drongo	0.927484	1.38515	-0.457662
CG3862	0.18457	0.346081	-0.161511
PGAP2	0.17368	0.133485	0.0401945
CG15880	0	0	0
Saf6	0.0882741	0.0390194	0.0492547
Pkg21D	0	0	0
Eaat2	0.00765972	0.00261905	0.00504067
lectin-21Cb	0	0	0
Plc21C	0.518422	0.344437	0.173985
CG33127	0	0	0
al	0	0	0
RpI135	0.0677628	0.162646	-0.0948834
RpLP1	2.448	3.34232	-0.89432
CG13692	0.00285683	0	0.00285683
BBS8	0	0.0143688	-0.0143688
ex	1.66577	1.19045	0.475323
shv	0.339854	0.450756	-0.110902
CG4133	0.00987487	0.0271436	-0.0172687
MED15	0.0913928	0.136627	-0.0452342
ush	0.202866	0.493753	-0.290887
Tspo	0.660864	2.56385	-1.90299
CG2794	0.101646	0.146591	-0.0449446
Sf3b1	0.164579	0.248331	-0.0837525
cold	0.27862	0.244797	0.0338228
Pph13	0	0	0
Gsc	0	0	0
Ptth	0.122929	0.0300072	0.0929214
Ipk2	0.167735	0.315563	-0.147828
Nle	0.0922208	0.221125	-0.128905
CG11835	0.0104604	0.0218461	-0.0113857
Ets21C	0.0276905	0.0580981	-0.0304075
Spp	0.546134	0.430134	0.116
lwr	0.435101	0.295322	0.139779
cbt	0.693222	0.775483	-0.0822609
CG4297	3.22925	2.06941	1.15984
crq	1.46128	0.715187	0.746093
CG11885	0.544937	0.583941	-0.0390041
CG13690	0	0.0175326	-0.0175326
CG4213	0.0163709	0.0177442	-0.00137323
Ent1	0.121537	0.070793	0.0507442
CG31921	0.0458338	0.0685516	-0.0227178
CG11911	0.226687	0.0594831	0.167204
CG11912	0	0.0204903	-0.0204903
dbr	0.409235	0.27657	0.132665
galectin	0.640368	0.658814	-0.0184456
CG11374	0.0143903	0	0.0143903
Zir	0.276126	0.239754	0.0363721
CG11377	0.427723	0.450168	-0.0224451
Gs1	0	0	0
CG11454	0	0	0
ND-15	0.505666	0.531666	-0.0259999
CG3436	0.36122	0.504356	-0.143135
mRpL10	0.441473	0.395395	0.046078
Tbc1d15-17	0.265598	0.418183	-0.152585
CG13693	0	0.0223814	-0.0223814
CG3345	0.0129937	0.0351004	-0.0221067
smo	0.180687	0.133736	0.0469512
CG11562	0.383005	0.353033	0.029972
Stip1	0.597508	0.911605	-0.314096
Pi3K21B	0.56887	0.952984	-0.384115
U2af38	0.301353	0.470485	-0.169132
Amnionless	0	0	0
CG3625	0.281035	0.223186	0.0578492
CG11601	0.373636	0.415956	-0.042319
CG3645	0.106767	0.16207	-0.0553028
CG17075	0	0	0
CG11617	0.00921575	0	0.00921575
CG3709	0.0811992	0.0503811	0.0308181
CG31974	0.510286	0.281073	0.229213
CG31975	0	0	0
ovm	0	0	0
CG13694	0.040182	0.0200597	0.0201223
Nhe1	0.312338	0.360834	-0.0484958
net	0.0200063	0.00905449	0.0109518
Cda5	0.310784	0.212774	0.09801
Ir21a	0	0.00686749	-0.00686749
l(2)gl	0.190995	0.466132	-0.275137
Spn77Bc	0.00856917	0.179805	-0.171236
eRF1	0.405719	0.215198	0.190521
CG5618	0.38778	0.297413	0.0903666
kin17	0.331791	0.238401	0.0933904
CG5665	0.00703213	0.00873414	-0.00170201
in	0	0.0194375	-0.0194375
CG13247	0	0.006297	-0.006297
RhoBTB	0.714496	0.661498	0.0529983
zye	0.0200297	0.0911539	-0.0711242
CtIP	0.112179	0.0926992	0.0194803
CG5910	0.204008	0.0980797	0.105928
mag	0.118825	0.301395	-0.18257
CG5955	0.0360393	0.0215332	0.0145061
CG5969	0.368202	0.30257	0.0656323
isoQC	0.16519	0.156823	0.00836728
ND-39	0.416737	0.556624	-0.139887
CG32425	0.240199	0.298275	-0.0580757
CG18281	0	0	0
CG17637	0	0	0
CG5078	0	0	0
CG5104	0.0848311	0.0931066	-0.00827557
CG4858	0.595178	0.440365	0.154813
CG13250	0	0.0137078	-0.0137078
knrl	0.0566735	0.0507386	0.00593491
Rcd2	0.151418	0.0301556	0.121262
CG4825	0.655493	0.384127	0.271365
mTerf3	0.127523	0.195813	-0.0682896
CG5059	0.58483	0.724449	-0.139619
ZnT77C	0.0232366	0.00314308	0.0200936
CG32428	1.28318	0.318312	0.964867
atk	0	0.00903802	-0.00903802
CG5199	0.12696	0.154061	-0.0271007
Hpd	0.310424	0.236247	0.0741777
mRpL15	0.33424	0.305021	0.0292187
Las	0.331426	0.468481	-0.137055
CG5262	0.179511	0.134134	0.0453778
CG5274	0.164657	0.104516	0.0601407
CG5282	0	0	0
CG13248	0	0	0
trbl	0.363235	0.760334	-0.397099
CG5498	0.415853	0.644873	-0.22902
Ide	0.271844	0.280914	-0.00907003
Toll-9	0	0	0
Rbbp5	0.259704	0.190758	0.0689455
CG13251	0	0.00890322	-0.00890322
CG13252	0.413627	0.329977	0.0836497
CG4186	0.22575	0.192519	0.0332307
Pitslre	2.11135	1.76214	0.349213
Pex14	0.51926	0.631758	-0.112498
tzn	0.377576	0.452552	-0.0749761
Spc105R	0	0	0
HIPP1	0.478247	0.458412	0.0198351
CG3288	0	0	0
CG13255	1.32178	0.484079	0.837697
CG11456	0.104311	0.163808	-0.0594967
CG11458	0	0	0
CG10589	0.0318292	0.0909637	-0.0591346
fng	0.0528717	0.328345	-0.275474
CG32432	0.00628105	0	0.00628105
CSN3	0.259807	0.294194	-0.0343865
CG3634	0.0191611	0	0.0191611
CG3698	0	0	0
Six4	0	0.011096	-0.011096
CG11396	0.130493	0.159741	-0.0292481
CG11399	0.083971	0.192731	-0.10876
Pex16	0.674167	0.727679	-0.0535112
CG4042	0.273126	0.300838	-0.0277119
CG4074	0.146775	0.0455173	0.101257
Gr77a	0	0	0
cmpy	0.00261241	0.0135138	-0.0109014
kni	0.0587079	0.0139634	0.0447444
CG10588	0.0259577	0.00379197	0.0221657
CG12984	0.00769685	0	0.00769685
Pdss2	0.23244	0.337917	-0.105477
Sin	0.160266	0.243308	-0.0830417
siz	2.0585	1.68336	0.375137
CG33284	0.0343047	0.224199	-0.189894
ICA69	0	0.0143995	-0.0143995
CG10512	0.242426	0.26845	-0.0260235
CG10508	0.0834168	0.13103	-0.0476132
Ilk	0.410594	0.631657	-0.221063
Eip78C	0.265307	0.379847	-0.11454
CG12975	0.14345	0.195913	-0.0524636
CG10510	0.0106355	0.0356797	-0.0250442
CG33056	0	0	0
CG33054	0.361323	0.228626	0.132697
park	0.244872	0.174258	0.0706141
Ac78C	0.777489	1.86934	-1.09185
CG10565	0.295007	0.527226	-0.232219
ko	0.0400723	0.0306398	0.0094325
CG33285	0	0	0
CG10584	0.138498	0.156583	-0.0180846
skd	1.95809	1.63151	0.32658
CG33286	0.00287754	0	0.00287754
CG33287	0	0.0128936	-0.0128936
CG12983	0.0092921	0.0633326	-0.0540405
CG10587	0.0101592	0.0285115	-0.0183523
CG11037	0.0378672	0.297873	-0.260006
Sems	0.00267175	0.0430365	-0.0403648
Cpr78Cb	0	0	0
Cpr78Cc	0	0	0
CG7632	0.26733	0.729585	-0.462255
Tsr1	0.109519	0.276917	-0.167398
CG32436	0.0284147	0.0289159	-0.000501216
CG32437	0.00600775	0.0197257	-0.0137179
CG32440	0.0417008	0.101873	-0.0601727
CG33288	0.00425921	0.0339843	-0.0297251
Aef1	0.242015	0.267336	-0.0253211
CG7519	0.444436	0.629275	-0.184839
Est-Q	0.186329	0.109476	0.0768528
M6	0.15957	0.297843	-0.138274
Cdk12	1.59234	1.40491	0.187432
CG7611	0.578498	0.54517	0.033328
ppk5	0	0	0
Rpn10	1.26697	1.4889	-0.221932
VhaM9.7-b	0.414229	0.271286	0.142943
CG33290	0	0.0503539	-0.0503539
CG7634	0.0158926	0.00866102	0.00723155
SMC5	0.117179	0.13161	-0.0144311
CG32441	0.203415	0.165805	0.0376094
CRIF	0.441438	0.440754	0.00068447
CG7173	0	0	0
Wnk	0.287024	0.3291	-0.0420763
Mkrn1	0.573739	0.552502	0.0212366
SAK	0.0664312	0.103092	-0.0366604
Hr78	0.494206	0.477822	0.0163835
CG7202	0.0313505	0.0518119	-0.0204614
Neu2	0.0240572	0	0.0240572
croc	0	0	0
CG5664	0.142224	0.152962	-0.0107381
barc	0.318859	0.463363	-0.144504
sa	0.0209918	0.0118387	0.0091531
CG12971	0.103536	0.187799	-0.0842625
ebd2	0.0271149	0.0916426	-0.0645278
CG7324	0.51699	0.42838	0.08861
Pc	0.16435	0.186517	-0.0221678
CG11309	0.23471	0.341769	-0.107058
Cpr78Ca	0.00563465	0.0193927	-0.0137581
CG12974	0.1628	0.169482	-0.00668259
ppl	0.349643	0.183495	0.166148
CG9389	0.0131115	0.112294	-0.0991825
CG9391	0.294132	0.399914	-0.105782
CG11307	0.18682	0.203858	-0.0170374
Alg11	0.534745	0.419142	0.115603
ORMDL	0.321682	0.386789	-0.0651064
CG32444	0.555749	0.591247	-0.0354983
CG32445	0.0602016	0.170983	-0.110781
Atox1	0.204515	0.125291	0.079223
CG11249	0	0.0124563	-0.0124563
CG11248	0.146605	0.094445	0.0521599
Rpb8	0.353549	0.322559	0.0309897
CG14573	0	0	0
CG14572	0	0	0
CG14564	0	0	0
CG7370	0	0	0
eg	0	0	0
CycH	0.187145	0.133466	0.0536794
CG7407	0.448814	0.427482	0.0213314
CG7414	0.258001	0.379904	-0.121904
CG14563	0	0	0
P5CDh1	0.517938	0.311923	0.206016
CG7148	0.18216	0.174943	0.00721714
CG32448	0.360732	0.5425	-0.181768
Syn1	0.0745692	0.328225	-0.253656
CG14565	0	0	0
CG14566	0	0	0
CG14567	0.24605	0.221821	0.0242286
CG14568	0	0	0
CG14569	0	0	0
CG14570	0	0	0
CG11247	0.517573	0.285415	0.232158
CG32447	0.0180264	0.0162776	0.00174882
Als2	0.148091	0.129816	0.0182742
Cpr78E	0.0110041	0	0.0110041
MED1	0.142049	0.156637	-0.0145875
CG7166	0.00854611	0.0101741	-0.00162797
S1P	0.085509	0.0801351	0.00537387
SLC22A	0.113801	0.152392	-0.0385912
CG14562	0.0935425	0.0855827	0.00795982
CG7458	0.123907	0.105013	0.0188943
Chs2	0	0.0207814	-0.0207814
CG7470	0.292108	0.590498	-0.29839
Act79B	0.125464	0.087743	0.0377213
Oct-TyrR	0	0.00852192	-0.00852192
CG14561	0.047122	0.0645346	-0.0174126
RpLP0	1.38301	2.02797	-0.644955
msopa	0.216005	0.255095	-0.0390904
CG7130	0.48351	0.823766	-0.340257
CG7133	0.419116	0.42323	-0.00411413
CG7139	0.538043	0.556101	-0.0180577
CG7140	0	0.00755165	-0.00755165
DNApol-eta	0.035806	0.0420045	-0.00619851
Ddx1	0.227725	0.117341	0.110383
Csp	0.436292	0.447692	-0.0114002
Srpk79D	0.127359	0.0904848	0.0368744
IleRS	0.302072	0.434023	-0.131951
CG32450	0.0356667	0.06194	-0.0262733
CG11449	0	0	0
CG11438	0.070946	0.0892595	-0.0183135
CG11437	0.0612846	0.111778	-0.0504936
CG11426	0.133552	0.101913	0.0316386
CG11425	0.0124741	0.212231	-0.199757
laza	0.475578	0.234426	0.241153
Ten-m	1.09181	1.24844	-0.15663
Hem	0.143298	0.151033	-0.00773574
CG11523	0.362935	0.30472	0.0582146
Rich	0.129125	0.113966	0.0151597
CG11404	0.0128607	0.0308079	-0.0179472
Trxr-2	0	0.0240116	-0.0240116
ND-B14.5AL	0.0274148	0.0562243	-0.0288095
CG14457	0.0161181	0.023947	-0.00782889
CG14456	0.0126468	0.0345959	-0.0219492
CG14453	0	0	0
CG14452	0	0	0
CG32453	0	0	0
CG11370	0	0	0
CG32452	0.0694726	0.0901838	-0.0207112
CG11367	0.149242	0.13024	0.019002
CG32454	0	0	0
CG7369	0.213198	0.171429	0.0417694
SPoCk	0.462179	0.426734	0.0354457
CG14448	0.026042	0.059222	-0.03318
l(3)04053	0.150276	0.196431	-0.0461559
CG11241	0.141102	0.121492	0.0196103
CG14450	0.182833	0.204516	-0.0216826
CG14451	0	0	0
ArfGAP3	0.466828	0.566684	-0.0998556
CG12546	0	0	0
CG14454	0	0	0
CG14455	0	0	0
CG14459	0.0928393	0.0965838	-0.00374454
CG11226	0.0435444	0.0505357	-0.00699129
CG13239	0	0.0129988	-0.0129988
CG33169	0.293637	0.349845	-0.0562078
CG11109	0.376253	0.476197	-0.0999443
Ssl1	0.195347	0.231639	-0.0362921
slif	0.108219	0.0960914	0.0121277
CG11131	0.00563465	0.0248112	-0.0191765
BoYb	0	0	0
CG12768	0	0	0
Mes2	0.869324	0.661723	0.2076
CG32457	0	0.0933297	-0.0933297
CG32461	0.00854611	0.0232695	-0.0147234
Chro	0.623604	0.290201	0.333403
Arf79F	1.09218	1.44051	-0.348324
CG11137	0.440721	0.324256	0.116465
CG32459	0.0229352	0.0495963	-0.0266611
CG32462	0	0.0665865	-0.0665865
Obp83cd	0.0369278	0.0101202	0.0268076
Vha14-2	0.0283058	0.0489283	-0.0206225
CG1077	0	0	0
Osi1	0	0	0
NPFR	0	0.013948	-0.013948
Osi24	0.367948	0.842333	-0.474385
Osi2	0	0	0
Osi3	0	0	0
Osi5	0	0	0
Osi6	0.0108167	0	0.0108167
Osi7	0	0	0
Osi8	0.00669133	0	0.00669133
Osi9	0.00680606	0	0.00680606
Osi12	0	0.0144985	-0.0144985
CG15594	0	0	0
Osi13	0	0	0
Osi14	0	0	0
Osi15	0	0	0
Osi16	0	0	0
CG31560	0	0	0
Osi17	0	0	0
Osi18	0	0	0
CG15597	0	0	0
Osi11	0	0	0
Osi4	0	0	0
CG31559	0	0	0
Obp83g	0.0259743	0.0335924	-0.00761811
Obp83ef	0.0528324	0.0135817	0.0392508
Gasp	0.0799082	0.152546	-0.0726377
Or83c	0	0	0
CG15580	0.00758652	0.00838721	-0.00080069
CG11459	0.0423735	0.0573764	-0.0150029
jagn	0.580153	0.469621	0.110533
kat-60L1	0.0195934	0.0325623	-0.012969
Rpn5	0.810686	1.41505	-0.604365
CG1218	0.218169	0.19164	0.0265288
CG10979	0.228486	0.371402	-0.142916
dgrn	0.209345	0.206153	0.00319267
CG1208	0.297909	0.110481	0.187428
CG1213	0.509627	0.264495	0.245132
CG14676	0.033867	0.0494124	-0.0155454
ECSIT	0.246884	0.166311	0.0805725
CG10280	0	0	0
Rm62	0.388984	0.854111	-0.465128
Obp83b	0.00690972	0.00928401	-0.00237429
Obp83a	0	0	0
CG11373	0.060174	0.22678	-0.166606
CG2017	0.491817	0.986748	-0.494931
disp	0.100365	0.123241	-0.0228764
CG2023	0.218562	0.176629	0.0419323
Hpr1	0.106349	0.161817	-0.0554683
PSMG1	1.5131	1.5615	-0.0484073
Hat1	0.278946	0.419877	-0.140931
CG2091	0.317605	0.237362	0.0802435
POLDIP2	0.402505	0.492098	-0.0895935
Snr1	0.208201	0.315099	-0.106898
Hcs	0.379661	0.339685	0.0399754
CG31550	0.296816	0.432547	-0.135731
Itpr	0.59019	0.38394	0.206249
Snm1	0	0.0656469	-0.0656469
CG12746	0.453563	0.473493	-0.0199291
Rheb	0.314855	0.35053	-0.0356746
Rev7	0.264104	0.427107	-0.163003
SecS	0.483223	0.668308	-0.185084
Atu	0.224909	0.468343	-0.243434
RpL13A	1.98262	2.87294	-0.890316
CG31551	0.00695512	0.0121397	-0.00518457
CG31549	0.459675	0.558727	-0.0990521
CG12171	0.434878	0.652441	-0.217563
CG12170	0.436174	0.57324	-0.137066
MED27	0.216931	0.215029	0.00190188
Wdr33	0.471455	0.415757	0.0556978
Atg17	0.861111	0.71086	0.150251
CG1239	0.247845	0.189887	0.0579581
CG1236	0.274629	0.32503	-0.0504018
Madm	0.174184	0.249774	-0.0755905
Sym	0.117394	0.160676	-0.0432823
CG2100	0.17874	0.187285	-0.00854493
cas	0	0	0
CG2104	0.00492659	0	0.00492659
Rab23	0.0232776	0.00186809	0.0214096
Xe7	0.783543	0.999828	-0.216285
CG2182	0.372214	0.560333	-0.188119
elm	0.353506	0.309197	0.0443092
MTA1-like	0.249395	0.17984	0.0695549
CG31548	0.305399	0.38828	-0.0828811
CG31546	0.0278594	0.0743252	-0.0464658
Spec2	0.130761	0.258762	-0.128002
CG2911	0	0	0
Rga	0.533997	0.637017	-0.10302
noi	0.173401	0.185416	-0.0120156
CG2926	0.591442	0.586428	0.00501339
CG2931	0.16992	0.256417	-0.0864971
CG14671	0.377979	0.320789	0.05719
Pi4KIIalpha	0.146388	0.492633	-0.346245
CG2519	0.338095	0.226803	0.111292
Nmdar1	0	0.00753973	-0.00753973
NKCC	0.0295054	0.0132882	0.0162172
ksr	0.121851	0.235691	-0.11384
HDAC3	0	0	0
mRpL44	0.175944	0.182679	-0.0067358
RpL35A	1.12869	1.67252	-0.543827
PEK	0.170745	0.234936	-0.0641914
dpr16	0.0111981	0.0202072	-0.00900908
CG12590	0	0	0
CG1116	0.220119	0.220502	-0.000382121
Vps37B	0.568114	0.506926	0.0611875
Mms19	0.110492	0.109703	0.000788475
CG1113	0.0557987	0.0372702	0.0185285
Tim17b1	0.0272739	0.0448857	-0.0176118
CG31542	0	0	0
RpII18	0.35258	0.240849	0.111731
CG12147	0.00438265	0.0292414	-0.0248588
Orco	0	0	0
CG2663	0.114961	0.258166	-0.143205
Or83a	0	0	0
kkv	0.00594032	0.0446034	-0.0386631
CG14668	0	0	0
Cerk	0.652757	0.656376	-0.00361895
CG11999	0.570696	0.527829	0.0428676
CG31538	0	0	0
Tim17a2	0.0434273	0.0560298	-0.0126026
CG12173	0.330737	0.202859	0.127878
CG12163	1.29955	0.850833	0.448713
CG33293	0	0	0
Kat60	0.472184	0.405017	0.0671664
Sccpdh1	0.487091	0.476703	0.0103881
Prosbeta2R2	0.15035	0.0671673	0.0831831
Gnf1	0.151686	0.400464	-0.248778
CG1124	0.0905332	0.0751882	0.015345
CG12007	0.461937	0.501294	-0.0393566
CG12589	0.0330939	0.0177239	0.0153701
corto	1.85799	1.7431	0.114884
plh	0.339554	0.234388	0.105166
CG14662	0.0228544	0.022236	0.000618398
CG14661	0.279472	0.476933	-0.19746
Ubc6	0.270942	0.488691	-0.217749
laf	0	0.0171097	-0.0171097
MED31	0	0	0
slx1	0.0678193	0.0305835	0.0372357
rpk	0.0162921	0.0149058	0.00138633
spartin	0.0229206	0.0379603	-0.0150397
atms	0.243563	0.337495	-0.0939319
CG1129	0.444223	0.279992	0.164231
BBS5	0.0171827	0.00438773	0.012795
CG14659	0.0111197	0.00633039	0.00478929
CG14658	0.0170148	0.146972	-0.129957
CG14657	0.225966	0.228443	-0.00247713
Hus1-like	0	0	0
CG17387	0.00671965	0.015638	-0.00891833
CG14655	0.0224642	0	0.0224642
Nep2	0.011696	0.0308057	-0.0191097
eIF3f1	0.32693	0.673856	-0.346926
Dlip2	0.205141	0.18065	0.0244913
CG9775	0.308077	0.351326	-0.0432493
CG32945	0	0.0616078	-0.0616078
MP1	0.0649046	0.045847	0.0190576
Suv3	0.106058	0.0821079	0.0239499
CG14645	0.0185228	0	0.0185228
CG1103	0.297033	0.28811	0.00892252
CG1090	0.00368577	0.009266	-0.00558023
Sfxn1-3	0.153399	0.230075	-0.0766755
Cont	0.205815	0.175239	0.0305761
tub	0.423085	0.460623	-0.0375384
CG14646	0.420668	0.473969	-0.0533018
CG14647	0.398537	0.472938	-0.074401
CG31528	0.0129379	0.0373007	-0.0243628
CG31525	0.0108167	0	0.0108167
CG1074	0.200035	0.225077	-0.0250428
CG14650	0.243325	0.426595	-0.18327
CG14651	0	0	0
Fip1	0.328513	0.588479	-0.259967
Mur82C	0	0	0
CG31523	3.14464	3.9468	-0.802163
CG31522	1.01953	1.4134	-0.393867
CG9804	0.248887	0.319955	-0.0710678
eIF3a	0.41747	0.575596	-0.158126
srl	0.159479	0.179283	-0.0198034
CG32944	0.0191653	0.159067	-0.139902
CG9855	0.328526	0.409182	-0.0806565
Skp2	0.269378	0.33998	-0.0706028
Vps24	0.532831	0.671303	-0.138472
Nepl11	0.21945	0.117862	0.101587
CG12581	0.142899	0.150811	-0.00791153
beta-Man	0.303275	0.221298	0.0819773
aux	0.172799	0.237189	-0.0643897
abs	0.0813523	0.116561	-0.0352088
Gel	0.189776	0.309911	-0.120135
TwdlF	0	0	0
TwdlV	0	0	0
Or82a	0	0	0
CG1092	0.104118	0.060154	0.0439642
CG9766	0.460837	0.158649	0.302188
TwdlG	0.0306566	0.00733138	0.0233252
CG14641	0.402838	0.402062	0.000776591
CG31516	0	0.0227662	-0.0227662
CG14636	0.0186547	0	0.0186547
Dsk	0.009694	0.0201784	-0.0104844
SelT	0.636423	0.464513	0.171911
Col4a1	0.21154	0.333248	-0.121708
SP555	0	0	0
senju	0.187074	0.129683	0.0573911
CG5828	0.180769	0.273618	-0.0928497
CG4230	0.190128	0.245691	-0.0555637
ND-13A	0.526109	0.41534	0.110769
Pgant5	0.704867	0.386158	0.318709
Rpn11	0.93815	1.40436	-0.466208
Nepl3	0.0150954	0.153697	-0.138601
CG14036	0.0464072	0.0800102	-0.033603
eIF3h	0.117084	0.120155	-0.00307024
CG9121	0.298582	0.112832	0.18575
CG31650	0.301461	0.159354	0.142107
vkg	0.160801	0.194494	-0.0336932
CG31917	0	0	0
Rtnl1	0.674297	0.845873	-0.171576
Cyp4ac1	0.176531	0.154653	0.0218785
Cyp4ac2	0.167359	0.101462	0.0658973
Cyp4ac3	0.895716	0.920932	-0.0252168
Bub1	0.0792243	0.273992	-0.194768
vri	0.294934	1.11986	-0.824931
cype	1.33999	1.08543	0.254554
TotM	0.153994	0.0854749	0.0685188
nompC	0.00857575	0.0193683	-0.0107925
H15	0.00585813	0	0.00585813
CG12512	0.17623	0.275428	-0.0991972
fusl	0.157082	0.289211	-0.132129
CG14022	0.0903389	0.15989	-0.0695515
Ncoa6	1.37646	1.37261	0.00384743
CG14024	0	0.0394714	-0.0394714
Bsg25D	0.265599	1.64116	-1.37556
tkv	0.797811	0.487594	0.310216
CG14020	0.00261241	0	0.00261241
cl	0.454799	0.815837	-0.361038
CG6907	0.24784	0.314682	-0.066842
Cap-D3	0.0635975	0.0779029	-0.0143055
CG31648	0	0	0
CG31915	0	0	0
Lam	0.200313	0.151325	0.0489882
Oscillin	0.509442	0.348837	0.160605
CG18269	0.00943479	0.025623	-0.0161882
CG14017	0.0102283	0.0162776	-0.00604929
GluRIIA	0.00523522	0	0.00523522
CG18266	0.0123569	0.0879832	-0.0756263
Hsp60C	0.0692402	0.151632	-0.082392
CG12511	0.0198844	0.0266295	-0.00674517
DIP-theta	0.0184523	0.0296351	-0.0111828
DIP-eta	0	0.0125546	-0.0125546
CG7251	0.00977276	0.0546113	-0.0448386
CG14011	0.0288791	0.0422716	-0.0133925
CG14013	0.0125796	0.0929549	-0.0803753
CG14014	0	0	0
Hel25E	0.318359	0.476396	-0.158037
CG14015	0.00498068	0	0.00498068
tomb	0.013541	0.0309951	-0.0174541
Coq6	0.404428	0.661972	-0.257544
Vps52	0.173776	0.133229	0.0405472
CG7382	0.340168	0.539391	-0.199223
CG7236	0	0.010795	-0.010795
sip1	0.0407368	0.0483968	-0.00765998
CG11030	0.325324	0.575486	-0.250162
CG11029	0	0	0
CG31913	0.0417595	0.042459	-0.000699475
CG7239	0.0743371	0.123377	-0.0490402
CG11034	0.071783	0.0273062	0.0444768
CG9029	0.156981	0.758448	-0.601468
bchs	0.166119	0.0677657	0.0983529
dsf	0	0	0
Gpdh1	0.500777	0.614882	-0.114105
CG9044	0.349368	0.233281	0.116087
CG13999	0.00458515	0	0.00458515
CG9016	0.181723	0.112923	0.0687992
CG14000	0.00770175	0.0110703	-0.00336857
CG9021	0	0.00702922	-0.00702922
Acp26Aa	0.0152388	0.0612912	-0.0460524
Acp26Ab	0.0845915	0.286036	-0.201445
rau	0.0203961	0.00339562	0.0170005
CG31644	0.072412	0.106416	-0.034004
CG14005	0.160371	0.127514	0.0328572
CG9171	0.361663	0.301325	0.0603388
obst-E	0.227471	0.265917	-0.0384464
CG11147	0.226422	0.259383	-0.0329614
CG14006	0	0.00935678	-0.00935678
CG11149	0.0435677	0.0295658	0.0140019
CG14007	0	0	0
Vm26Ab	0	0	0
Ucp4C	0.0157025	0.0569811	-0.0412786
Ucp4B	0	0	0
eIF4A	1.75293	2.57983	-0.826902
ifc	0.361063	0.377382	-0.0163191
Tsp26A	0.0628634	0.249495	-0.186631
CG13996	0	0	0
CG31643	0.118207	0.146476	-0.0282693
IPIP	0.222819	0.229055	-0.00623643
CG9135	0.199306	0.182428	0.0168773
CG13995	0	0	0
CG13994	0.398416	0.498972	-0.100556
CG9147	0.149103	0.234816	-0.085713
Pfdn1	0.408844	0.456831	-0.0479873
CG31642	0	0	0
CG9222	0.0108376	0.0879258	-0.0770882
CG13991	0.00479275	0.014722	-0.00992925
Muc26B	0	0	0
CG13989	0.0175695	0.0414954	-0.0239259
CG31639	0.137937	0.170869	-0.0329317
WDR79	0.0505097	0.0979398	-0.0474301
CG9175	0.192848	0.295538	-0.10269
CG9154	0.215095	0.118687	0.096408
CG9150	0.0438019	0.0146767	0.0291252
Fbw5	0.0651617	0.0298625	0.0352992
ND-51	0.26169	0.367498	-0.105808
slmo	0.333843	0.392877	-0.0590337
Pfas	0.238659	0.28182	-0.0431606
CG9117	0.107052	0.0649998	0.042052
mtm	0.256398	0.304949	-0.0485508
CG9107	0.118792	0.273466	-0.154674
H2.0	0	0	0
Gal	0.144087	0.0563857	0.0877017
lid	2.01425	2.61622	-0.601972
chic	0.413741	0.982916	-0.569175
CG13992	0	0	0
Vm26Aa	0	0	0
CG13998	0	0	0
Ugt37B1	0.0146315	0.0192358	-0.00460433
AANATL2	0	0	0
CG13984	0	0	0
Cpr	3.31152	3.96025	-0.648725
ppk14	0	0.00586399	-0.00586399
Nepl4	1.11449	0.622718	0.491771
slam	0.835375	1.56026	-0.724888
Nepl5	0.0067915	0	0.0067915
CG13982	0.00528752	0.0100036	-0.00471607
frj	0.511526	0.534658	-0.0231324
Daxx	0.222429	0.1405	0.0819288
epsilonCOP	0.35837	0.475427	-0.117057
CG31638	0.134586	0.0496619	0.0849238
CG9547	0.392421	0.424564	-0.0321438
Phf5a	0.473956	0.449911	0.0240451
KFase	0.0509826	0.0674553	-0.0164727
CG9536	0.251371	0.257147	-0.00577524
HemK1	0.0863419	0.101848	-0.0155059
Rchy1	0.00617812	0.0468477	-0.0406696
retm	0.111818	0.223206	-0.111388
Tig	0.303554	0.293491	0.0100637
CG9500	0.0214691	0	0.0214691
CG9498	0.358734	0.316856	0.0418778
CG9497	0.054394	0.0732498	-0.0188558
Pez	0.172876	0.114716	0.0581606
CG13983	0	0	0
CG9550	0.0258239	0.0302958	-0.00447191
CG31637	0.327468	0.308019	0.0194496
COX5B	0.981748	0.752358	0.22939
COX5BL	0.10732	0.188581	-0.0812604
CG11050	0.348316	0.295277	0.0530394
CG11070	0.304082	0.343722	-0.0396404
cup	0	0	0
Aatf	0.200402	0.442482	-0.24208
Liprin-alpha	0.318751	0.21945	0.0993009
TTLL3B	0	0.0665976	-0.0665976
meng	0.0132282	0.0303031	-0.0170749
CG31910	0.043881	0.11365	-0.0697687
TTLL3A	0	0	0
homer	0.232666	0.387542	-0.154875
AkhR	0.559964	0.256186	0.303777
Tsp	0.123484	0.105675	0.0178085
CG11327	0.0284722	0.0922216	-0.0637494
Nhe3	0.861241	0.712506	0.148735
Nse1	0.0516291	0.111379	-0.0597495
cort	0.00724057	0.0152875	-0.00804698
Spn27A	0.234417	0.148039	0.086378
CG13771	0	0.0259325	-0.0259325
CG31636	0.00474264	0.0315712	-0.0268286
CG31633	0.119659	0.0751968	0.0444626
CG31635	1.12878	1.02481	0.103974
Oatp26F	0.00924257	0.044179	-0.0349365
DIP-iota	0	0.00739954	-0.00739954
CG13766	0.151774	0.120803	0.0309709
CG9596	0.163062	0.166076	-0.00301365
IFT52	0	0	0
CG17378	0.0360724	0.0357584	0.000314005
CG11236	0.144981	0.0502789	0.0947017
sens-2	0.0173717	0.0327359	-0.0153642
Rca1	0.0681586	0.142224	-0.0740649
Nlg2	0.0399733	0	0.0399733
Rat1	0.242531	0.307781	-0.06525
Hrb27C	1.47872	1.78214	-0.30342
SA	0.0561296	0.11637	-0.0602409
CG3430	0.027679	0.0374897	-0.00981066
Hmgcl	0.324804	0.404706	-0.0799016
Coprox	0.398487	0.810902	-0.412415
uif	0.140742	0.161082	-0.0203403
snRNP-U1-70K	0.324146	0.201763	0.122383
sip2	0.0207298	0.0959212	-0.0751914
Atac1	0.124702	0.213694	-0.0889914
CG13775	0.11098	0.164117	-0.0531369
Gas41	0.165289	0.187129	-0.02184
ihog	0.0142105	0.0289426	-0.0147321
Fgop2	0.215278	0.282517	-0.067239
CG18304	1.53116	0.407446	1.12372
x16	0.10557	0.248375	-0.142806
nop5	0	0	0
CG32829	0	0	0
Wee1	0.102402	0.141865	-0.0394636
CG13773	0.24213	0.391501	-0.149371
Nha1	0.0815039	0.0751286	0.00637527
CG17375	0.00854611	0.0305112	-0.0219651
CG17376	0.232821	0.341706	-0.108885
nrv1	0.27119	0.297301	-0.0261109
LUBEL	0.0385148	0.0336864	0.00482843
CG11322	0	0	0
Pcp	0	0	0
MME1	0.312511	0.635951	-0.32344
Mnn1	0.861865	0.782159	0.0797061
Ugt307A1	0	0	0
MICU1	0.332014	0.443885	-0.111871
CG31909	0.123044	0.130353	-0.00730877
CG13786	0	0	0
CG13784	1.21692	0.649119	0.5678
CG4502	1.48246	1.29164	0.190819
CG4497	0.123702	0.0838058	0.0398961
CG4496	0.008366	0.0396119	-0.0312459
Pvf2	0.0447979	0.0933568	-0.0485588
Nuf2	0.0265954	0.145483	-0.118888
Mst27D	0.023008	0.0634438	-0.0404358
Rab30	0.218239	0.327531	-0.109291
CG31908	0.449912	0.536869	-0.0869568
Wnt6	0.358374	0.24323	0.115145
Wnt10	0	0	0
ninaC	0	0	0
gudu	0.00438265	0.04412	-0.0397374
CG5171	0.345888	0.247074	0.0988131
CG5177	0.157739	0.200018	-0.0422793
CG15818	0	0.0101741	-0.0101741
chm	0.222977	0.206709	0.016268
CG5973	3.432	1.69944	1.73256
CG6055	0.00221825	0.0314532	-0.0292349
CG6441	0.0285763	0.0254372	0.00313913
Obp28a	0	0	0
Gr28b	0.00806841	0	0.00806841
Gr28a	0	0	0
santa-maria	0.18734	0.198569	-0.0112283
CG5958	0.192126	0.372459	-0.180333
CG5181	0.176741	0.20126	-0.0245188
CG5160	0.0438457	0.0440371	-0.000191363
CG5149	0.147593	0.184818	-0.0372249
Spn28B	0.0392774	0.0480702	-0.00879277
Cyp4d21	0.0345326	0.0501158	-0.0155832
CG6739	0	0.0106269	-0.0106269
Myo28B1	0.0175945	0.0503303	-0.0327358
Tep3	0.0520711	0.0708819	-0.0188108
ATPsynGL	0.101491	0.122569	-0.0210781
Uro	0.139646	0.311733	-0.172087
CG7164	0.0250608	0.149365	-0.124304
CG7154	0.62695	0.81532	-0.18837
r2d2	0.752766	0.573925	0.178841
cdc14	1.16301	0.86842	0.294586
Herp	0.319943	0.428757	-0.108814
CG7149	0.289981	0.0830315	0.206949
CG7203	0.231177	0.0824449	0.148732
CG7214	0.00875824	0	0.00875824
Acp1	0	0	0
CG13796	0.123028	0.0256627	0.097365
CG13795	0.0621994	0.117916	-0.055717
CG13794	0.0345636	0.153096	-0.118532
CG13793	0.170159	0.125939	0.0442195
CG33296	0.136155	0.158285	-0.0221296
Tep2	0.0924861	0.160739	-0.0682533
CG18585	0.0336873	0.0393932	-0.00570591
CG7115	0.710963	0.69952	0.0114434
mts	0.366427	0.592106	-0.225679
CG14537	0.00555579	0.076506	-0.0709502
CG7231	0.640379	0.324415	0.315964
Tg	0.86137	1.12273	-0.261361
baf	0.369908	0.421837	-0.051929
Cka	1.16941	1.18426	-0.0148462
CCDC53	0.329366	0.267914	0.0614519
Megf8	0.198458	0.14998	0.0484781
Trf	0.125918	0.224387	-0.0984697
MED20	0.104417	0.213003	-0.108586
poe	0.517806	0.632151	-0.114345
RpL36A	1.4152	1.99514	-0.579937
CG7367	0.210238	0.112666	0.0975718
CG12560	0.303014	0.154299	0.148715
Spn28Dc	0.0508354	0.152358	-0.101523
Wwox	0.308493	0.370237	-0.061744
CG7227	0.0857148	0.0336208	0.052094
pes	1.25449	1.31438	-0.0598932
Spn28Db	0	0	0
Spn28Da	0.0161111	0.0302452	-0.014134
CG7102	0.0257631	0.0343494	-0.00858637
spz3	0.0107435	0	0.0107435
Proc	0	0	0
TwdlE	0.0110809	0	0.0110809
CG14535	0.0054045	0	0.0054045
Rack1	1.17982	1.61282	-0.432992
CG8673	0.00900664	0.0351322	-0.0261256
CG8668	1.15225	0.94721	0.205037
CG31606	0	0	0
CG8460	0.249454	0.196443	0.0530105
PGAP5	0.14197	0.275177	-0.133207
CG8419	0	0.0134757	-0.0134757
Ssb-c31a	0.230079	0.269054	-0.0389745
CG8353	0.330907	0.216459	0.114448
CG8349	0.0357814	0.0971707	-0.0613893
CG14277	0.019534	0	0.019534
Scgalpha	0.0391091	0.033832	0.00527703
CG7840	0.393303	0.359089	0.0342146
Mettl14	0.0774747	0.18786	-0.110386
CG7806	0.10101	0.0958774	0.00513285
strat	0.239564	0.261864	-0.0223002
CG14275	0.105236	0.349469	-0.244233
CG14273	0	0	0
CG7778	0.228767	0.0704094	0.158358
Mur29B	0.0571732	0.133769	-0.0765956
CG7627	0.208235	0.0834825	0.124753
CG7781	0.0454567	0.0489994	-0.00354264
CG7810	0.0946835	0.129249	-0.0345655
Ostgamma	0.329346	0.576505	-0.247159
Btk29A	0.379295	0.319019	0.0602768
CG8086	0.142594	0.0760915	0.066502
Spn28F	0.097683	0.313513	-0.21583
Pvr	1.61674	1.86407	-0.247325
Snx6	0.438177	0.483627	-0.0454504
CG8292	0.0329789	0.0541419	-0.0211629
CG8372	0.394587	0.484095	-0.0895074
Su(var)205	0.318373	0.297764	0.0206089
SLC5A11	0.152282	0.11008	0.0422018
Acbp1	0.276602	0.243906	0.0326961
PAPLA1	0.462196	0.456585	0.00561114
CG12375	0.392172	0.541352	-0.14918
mon2	0.094731	0.110952	-0.0162212
CG17292	2.36331	0.675657	1.68766
Wdr82	0.318848	0.416799	-0.0979507
CG17294	0.366779	0.543738	-0.176959
Rcd4	0.439581	0.284939	0.154641
CG13384	0.4278	0.313267	0.114533
CG13385	0	0.0353074	-0.0353074
CG13386	0	0	0
CG31898	0.0218506	0.0616459	-0.0397953
emb	0.535814	0.72507	-0.189256
Akap200	0.301584	0.27997	0.0216134
CG31897	0	0.00464373	-0.00464373
CheA29a	0	0	0
CG13088	0.109498	0.103534	0.00596377
PIG-U	0.135177	0.163645	-0.0284683
Uba4	0.073574	0.16448	-0.0909059
Sgp	4.67233	1.45591	3.21642
Acer	0.223277	0.0976173	0.12566
CG17834	0.847735	0.333419	0.514316
Sema1a	0.470243	0.303916	0.166326
mRpL51	0.480629	0.324885	0.155743
CG13097	0.155361	0.202004	-0.0466424
CG13096	0.318735	0.515483	-0.196748
Dh31	0.00350282	0	0.00350282
Bace	0	0	0
Agpat2	0.0348048	0.133319	-0.098514
D12	0.00918005	0.0732205	-0.0640405
grk	0.0560688	0.126917	-0.0708482
CG13398	0.222307	0.443468	-0.221162
CG13397	0.0581247	0.078458	-0.0203333
fy	0.0769866	0.122697	-0.0457107
Peritrophin-15a	0.316097	0.305598	0.0104991
Peritrophin-15b	0.00265167	0	0.00265167
lectin-29Ca	0.127852	0.329043	-0.201191
Acp29AB	0.0866711	0.130574	-0.0439026
CG13392	0.266017	0.204313	0.0617039
CG13390	0.145319	0.305285	-0.159966
Glt	0.218615	0.25408	-0.0354653
CG9314	0.113221	0.0690508	0.04417
CG12438	0.00397654	0	0.00397654
SoxN	0	0.0354862	-0.0354862
CG32986	0.00615923	0.0203352	-0.014176
CG32987	0	0	0
CG32988	0.00758652	0	0.00758652
CG32983	0	0.0143246	-0.0143246
CG9483	0.021448	0.0454428	-0.0239948
LManVI	0.124698	0.0847092	0.0399892
LManV	0.0994237	0.132563	-0.033139
LManIV	0.00972368	0	0.00972368
LManIII	0.0306864	0	0.0306864
raw	0.679865	0.942439	-0.262574
Hnf4	3.23958	2.54113	0.698449
PrBP	0.261976	0.16976	0.0922158
CG9289	0	0	0
CG9287	0	0	0
Tsp29Fa	0.205892	0.217842	-0.0119494
Tsp29Fb	0.169454	0.126223	0.0432314
CG32985	0	0.00900394	-0.00900394
CG32984	0.00343463	0	0.00343463
CG18088	0	0	0
CG18662	0.120801	0.274756	-0.153955
CG9555	0.0265073	0.0390096	-0.0125023
CG17906	0.0111002	0	0.0111002
CG18661	0.0704533	0.0633305	0.00712287
Try29F	0.0446773	0.0765896	-0.0319123
CG9568	0.226562	0.190574	0.0359874
CG13102	0.299082	0.187994	0.111088
CG12439	0.029946	0	0.029946
Toll-4	0	0	0
CG31609	0.043954	0.0329638	0.0109902
Or30a	0	0	0
CG32982	0.292251	0.257256	0.0349955
CG13108	0.00890561	0	0.00890561
CG9586	0.367309	0.561509	-0.1942
DIP-zeta	0.0191148	0	0.0191148
CG9582	0.0126217	0.0260546	-0.013433
Rcd-1r	0.0154506	0.0107465	0.00470418
alien	0.376093	0.429622	-0.0535285
rost	0.137325	0.117785	0.0195404
CG13101	0.228588	0.230977	-0.00238993
CG9541	0	0.010441	-0.010441
CG9525	0	0	0
CG31886	0.266993	0.165498	0.101494
C1GalTA	0.850198	0.319951	0.530247
tai	4.32701	3.9729	0.35411
CG17005	0	0.00738809	-0.00738809
Cks30A	0	0.0101958	-0.0101958
Eaat1	0.308089	0.219755	0.0883336
CG3748	0.00583124	0.0102395	-0.00440829
CG13110	0.0957451	0.0750906	0.0206544
Aldh	1.12421	0.973975	0.150239
Mco1	0.0108154	0	0.0108154
scat	0.143761	0.126704	0.0170569
CG3769	0	0	0
CG4438	0	0	0
borr	0.0421597	0.116582	-0.074422
aust	0	0.0250131	-0.0250131
numb	1.28115	0.721245	0.559903
Oatp30B	0.326809	0.37013	-0.0433209
CG31883	0	0	0
CG17855	0.0379723	0.017687	0.0202854
Cpr30B	0	0	0
CG13113	0	0	0
CG13114	0	0	0
CG3841	0.0450102	0.0253489	0.0196613
gcm2	0	0	0
Trx-2	0.881776	0.947921	-0.0661453
GlcAT-S	0.266756	0.29757	-0.0308142
Apoltp	0.255012	0.328305	-0.0732928
CG33299	0	0	0
pelo	0.509493	0.562192	-0.0526983
CG4364	0.461666	0.499539	-0.0378729
CG31710	0.178606	0.161453	0.0171532
Pka-C1	2.20472	1.91016	0.294557
CG31882	0.00859236	0.0881771	-0.0795847
CG4382	0	0	0
gcm	0	0	0
CG31709	0.145133	0.306323	-0.16119
Mtpalpha	0.236888	0.349774	-0.112886
jp	0.260492	0.173915	0.0865771
Gdi	0.524093	0.296927	0.227166
CG13116	0.0758395	0.157502	-0.0816624
CG13117	0.0981183	0.196612	-0.0984932
CG4017	0	0	0
CG17633	0.246427	0.207641	0.0387856
IP3K1	0.291606	0.871107	-0.579501
CG4036	0.318667	0.442951	-0.124284
CG4709	0.239971	0.225547	0.0144235
CG4658	0.517738	0.457463	0.0602746
CG5850	0.203395	0.329288	-0.125893
CG5846	0.542458	0.389893	0.152565
CG13126	0.112347	0.201239	-0.0888919
CG13123	0.139962	0.115148	0.0248143
Taf11	0.255191	0.398042	-0.142852
Cyp4e3	0.233486	0.351466	-0.117981
Nckx30C	0.053985	0.38607	-0.332085
bib	0.00845509	0	0.00845509
Ndf	0.753733	0.963653	-0.20992
Trp1	0.795389	0.74402	0.0513696
CG13127	0.00555579	0.00711298	-0.0015572
obst-B	0.0587691	0.0331556	0.0256135
Cpr31A	0	0	0
Spn31A	0.0532162	0.0435695	0.0096467
CG4839	0.0724712	0.0139684	0.0585028
CG13137	0	0	0
RpL7	1.58402	2.40379	-0.819771
CG4901	0.0638896	0.0288886	0.035001
CG4908	0.173239	0.23566	-0.0624208
eEF1delta	0.499185	0.611511	-0.112326
ova	0.619028	0.425335	0.193693
CG5708	0.278437	0.472768	-0.19433
Npc1a	0.485249	0.511532	-0.0262826
CG5727	0.308245	0.230803	0.0774418
CG5731	0.0620512	0.0124975	0.0495537
Snx17	0.323575	0.476956	-0.153381
Ripalpha	0.562624	0.462781	0.0998427
Sur	0.191706	0.1656	0.0261057
Fum4	0	0	0
CG13135	0	0	0
CG13133	0	0	0
CG13131	0	0.00735396	-0.00735396
SoYb	0	0	0
CG31875	0.0571969	0.0379145	0.0192824
me31B	0.41308	0.43782	-0.02474
CG31717	0.295098	0.492797	-0.197699
Ror	0	0	0
CG4953	0.263981	0.387951	-0.12397
CG4957	0.325998	0.292579	0.0334186
CG4968	0.488532	0.3789	0.109632
CG4972	0.328161	0.329594	-0.00143207
CG4995	0.112484	0.232335	-0.119851
CG5037	0.26363	0.235656	0.0279733
GATAd	0.18347	0.125711	0.0577583
SamDC	0.170856	0.0828522	0.0880033
CG31715	0.209496	0.240119	-0.0306225
Sps2	0.233101	0.411191	-0.178089
CG5022	0.0140395	0.0124239	0.00161557
ClpP	0.300026	0.189829	0.110197
pim	0.0384113	0.0338412	0.00457004
lft	0.0968272	0.119342	-0.0225151
CG5056	0.284104	0.245143	0.0389603
dpr19	0.00821451	0.00541823	0.00279628
gny	0.146951	0.231318	-0.0843675
CG5096	0.178565	0.206545	-0.0279806
mRpS7	0.369282	0.451399	-0.082117
Cnot4	0.88345	1.65493	-0.771484
Ir31a	0.00863911	0.0122017	-0.00356262
RpS27A	1.79063	1.87025	-0.0796244
Ip259	0	0	0
Klp31E	0.12226	0.0441449	0.0781146
RfC3	0.0751133	0.109105	-0.0339913
Wdfy2	0.391033	0.463585	-0.0725515
CG5188	0.230078	0.262608	-0.0325299
TfIIB	0.238576	0.258809	-0.0202326
holn1	0.281873	0.287211	-0.00533768
STUB1	0.503917	0.62008	-0.116163
Nse4	0.219768	0.220368	-0.000600231
loh	0.651836	0.223538	0.428298
LManII	0.110648	0.344322	-0.233674
RluA-2	0.221153	0.234254	-0.0131011
Grip75	0.119642	0.0623864	0.0572555
CG13144	0	0	0
Cog4	0.160081	0.132791	0.0272896
RluA-1	0.0490234	0.0529837	-0.00396025
LManI	0.0533006	0.0339143	0.0193863
TBC1D16	0.0130247	0.0187952	-0.00577053
Bug22	0.283099	0.237054	0.0460455
pie	0.0730686	0.199503	-0.126435
CG5355	0.424944	0.547947	-0.123003
Cdk1	0	0.124174	-0.124174
CG33303	0.524158	0.512414	0.0117437
Cand1	0.109951	0.118742	-0.00879109
CG5367	0	0.0214175	-0.0214175
Schip1	0.0178353	0.035413	-0.0175776
RnrL	0.0395287	0.218225	-0.178696
CG5381	0.212679	0.431578	-0.218899
Usp14	0.953831	1.0631	-0.109265
Cdk5alpha	0.0610722	0.0155782	0.045494
CG5390	0.309624	0.072174	0.23745
nmd	0.443332	0.617963	-0.174631
CG13138	0	0	0
CYLD	0.456306	0.313325	0.142981
Hand	0.363943	0.298838	0.0651052
Ufd4	0.379161	0.488476	-0.109315
trk	0.00937906	0.0547357	-0.0453567
Rsf1	0.446838	0.563202	-0.116364
CG5676	0.26399	0.486926	-0.222936
bsk	0.435985	0.454841	-0.0188556
chico	0.386089	0.236021	0.150068
CG6094	0.251153	0.43537	-0.184216
Lrr47	0.071986	0.162594	-0.0906081
Lip4	0.35428	0.135663	0.218617
CG18301	0.119644	0.113091	0.00655303
CG18302	0.227114	0.0596249	0.167489
CG6138	0	0	0
CG31872	0.0633994	0.103635	-0.0402354
CG18284	0.0681812	0.169811	-0.10163
CG17098	0.0128054	0.00973068	0.00307472
CG31871	0	0	0
CG17104	0.00554608	0.0148133	-0.00926725
CG17105	0	0	0
CG17107	0.0917504	0.216023	-0.124272
CG6415	0.196169	0.059362	0.136807
CG6431	0	0	0
CG6443	0.209921	0.203849	0.0060723
CG17118	0.0356383	0.0597687	-0.0241304
Dpy-30L1	0.264394	0.357193	-0.0927986
CG12299	0.0346209	0.0460927	-0.0114718
CG6495	0.0307795	0.00858318	0.0221963
Ubc2	0.392669	0.608856	-0.216187
CG17124	1.26073	0.901776	0.358955
CG6729	0.0506344	0.125506	-0.0748715
Vha16-5	0.0346793	0.0173452	0.0173341
Nup107	0.141571	0.294675	-0.153104
EMC3	0.693177	0.776057	-0.0828796
Lip2	0.00943479	0.0612173	-0.0517825
Lip1	0	0	0
CG7300	0	0	0
CG17108	1.13613	1.30771	-0.171576
CG7294	0.0365573	0.0102176	0.0263397
CG7296	0.185578	0.0548776	0.130701
CG7299	0.0072077	0.013948	-0.0067403
CG7329	0.050595	0.0373559	0.0132391
w-cup	0.0245823	0.215701	-0.191119
CG7384	0.151966	0.13137	0.0205961
CG17127	0.0331334	0.0478638	-0.0147304
CG31870	0.0579638	0.262062	-0.204098
CG6508	0	0	0
CG17134	0	0	0
Stam	0.324495	0.29778	0.026715
CG12517	0	0.00858318	-0.00858318
CG14072	0.0150443	0.176459	-0.161415
YL-1	0.333046	0.42169	-0.0886433
CG16743	0.244057	0.179216	0.0648414
SCAR	0.211345	0.374142	-0.162797
CG12253	0.0356108	0.0252621	0.0103487
TTLL4A	0.312833	0.23552	0.0773131
lectin-33A	0.154945	0.0292961	0.125649
Acp32CD	0.181251	0.38299	-0.201739
CG14913	0	0.0234681	-0.0234681
CG18666	0.0148652	0.0205519	-0.00568669
Samuel	1.92047	1.88518	0.0352881
Art8	0.0918489	0.155082	-0.0632335
RpL9	1.08198	1.21379	-0.131809
aub	0	0.0175972	-0.0175972
piwi	0	0	0
ATPsynG	1.07506	1.07926	-0.00420087
abo	0.0771059	0.120704	-0.0435983
CG33129	0.889974	0.801697	0.0882769
CG14069	0.0142492	0.0310814	-0.0168322
CG7309	0.0237262	0.036143	-0.0124168
CG14070	0.0263706	0.0210367	0.00533388
CG14071	0.00740951	0.0525269	-0.0451174
aurB	0.0234306	0.130156	-0.106725
Dnz1	0.25477	0.407457	-0.152686
Porin2	0.0889242	0.269455	-0.180531
CG6700	0.704691	0.792955	-0.0882639
CG31869	0.0227654	0.0325603	-0.0097949
CG6724	0.125643	0.276266	-0.150623
CG14915	0	0	0
CG16854	0	0	0
Wdr59	0.148969	0.164909	-0.0159403
Gr32a	0	0	0
CG4751	0.0377195	0.091889	-0.0541695
hgo	0.133193	0.189626	-0.056433
CG4788	0.0981608	0.125172	-0.0270115
Ppt2	0.489412	0.53735	-0.047938
mre11	0.0829405	0.219563	-0.136623
cmet	0.0217524	0.0044532	0.0172992
Vm32E	0	0	0
CG6287	0.819582	0.511369	0.308213
Gyc32E	0	0	0
CG31867	0	0	0
RfC38	0.152077	0.269959	-0.117881
Csl4	0.185049	0.252683	-0.067634
CG14921	0.0424696	0.136133	-0.0936638
CG6230	0.229296	0.24319	-0.0138939
CG6201	0	0.00689725	-0.00689725
Reps	0.351491	0.405557	-0.0540659
AstCC	0	0.0139889	-0.0139889
AstC	0.0739129	0.0288945	0.0450184
salr	0.771078	0.957404	-0.186326
sala	0	0	0
spz4	0.0195721	0.00512736	0.0144447
CG31706	0	0.00962068	-0.00962068
CG31705	0.336692	0.251168	0.0855248
CG14930	0.0195637	0.0362223	-0.0166586
Dlg5	0.251802	0.348748	-0.0969455
CG14926	0.0316179	0.215943	-0.184326
kek2	0.0573931	0.146359	-0.0889656
CG4983	0.0137907	0.203065	-0.189274
CG4988	0.0192801	0.0256949	-0.00641477
Vha100-5	0.10162	0.112485	-0.0108655
CG14931	0.018191	0	0.018191
CG14932	0.0290618	0.10375	-0.074688
CycY	0.293624	0.224798	0.0688258
crol	2.28168	4.10089	-1.81921
CG14937	0.148558	0.197807	-0.0492487
Tsp33B	0.00440087	0.0451623	-0.0407615
CG12307	0.0670383	0.1789	-0.111862
spag4	0	0.00893655	-0.00893655
Mst33A	0.0379324	0.149153	-0.111221
CG31704	0.242333	0.371331	-0.128998
CG14933	0	0	0
Mal-B1	0.255186	0.165447	0.0897393
Mal-B2	0.0338622	0.224314	-0.190452
Or33a	0	0	0
Or33b	0	0	0
Or33c	0	0	0
Crys	0	0	0
CG16964	0.0170304	0.127691	-0.110661
CG16965	0.0289272	0.0210694	0.0078578
dgt2	0.0525279	0.203169	-0.150641
Ada1-2	0.114656	0.0992959	0.0153597
Qtzl	0.207746	0.347559	-0.139813
Ada1-1	0	0	0
Nfs1	0.614634	1.06007	-0.44544
Rh5	0.0228395	0.00277425	0.0200653
dmGlut	0.0297515	0.168063	-0.138311
CG18788	0	0	0
PLCXD	0.160154	0.251045	-0.0908912
RpL7-like	0	0	0
CG14947	0	0	0
Rab3-GAP	0.168341	0.387292	-0.21895
Plzf	0.090814	0.0790167	0.0117973
CG6770	2.87341	2.1321	0.74131
CG6785	0.189176	0.0606133	0.128562
CG6766	0.455409	0.40664	0.0487694
Tom70	0.156736	0.227945	-0.0712083
Wdr81	0.0570572	0.079523	-0.0224658
Hacd1	2.69237	2.65069	0.0416762
CG18787	0.428613	0.482753	-0.0541393
CG18789	0.0406696	0.101857	-0.0611876
esc	0	0	0
Pex19	0.385252	0.44141	-0.056158
Mt2	0.116778	0.0966565	0.0201212
Ced-12	0.0695544	0.127387	-0.0578329
ThrRS	0.479106	0.755294	-0.276189
CG17211	0	0.0137021	-0.0137021
Gr33a	0	0	0
CG31760	0	0	0
CG31861	0	0	0
ZnT33D	0	0	0
CG17217	0.00765972	0.0387528	-0.0310931
crok	0.277215	0.160435	0.11678
bru1	1.29621	0.642233	0.653973
CG31759	0	0	0
CG31862	0	0	0
CG17010	0	0	0
atilla	0.410835	0.390898	0.0199378
CG6583	0.223353	0.282275	-0.0589213
rho-6	0.0133034	0.00977827	0.00352511
Rab6	0.450001	0.692545	-0.242543
Patsas	0	0	0
CG6712	0.316714	0.354056	-0.0373414
Pkd2	0.173782	0.0401503	0.133632
CG6405	0.00815125	0	0.00815125
CG6388	0.0913143	0.147779	-0.0564648
eRF3	0.597296	0.912783	-0.315488
Oatp33Eb	0	0.0272442	-0.0272442
Ref2	0.0216706	0.0258347	-0.00416411
t-cup	0	0	0
CG5418	0.0101918	0.015638	-0.00544618
CG5421	0	0.00824245	-0.00824245
Oatp33Ea	0.0288896	0.0271841	0.00170554
CG5435	0.0484438	0.11081	-0.0623666
CG5446	0.367423	0.359997	0.00742671
pdm2	0.0044943	0.0137869	-0.00929263
CG6153	0.470014	0.448232	0.0217823
PICK1	0.0128128	0.0266564	-0.0138436
spict	0.467925	0.663612	-0.195688
CG6180	0.40421	0.406266	-0.00205644
kek1	0.140052	0.22143	-0.0813776
CG15483	0	0.0264818	-0.0264818
CG5787	0.0913178	0.216868	-0.12555
CG15484	0.0138297	0.0418522	-0.0280226
CG5776	0.042585	0.0557807	-0.0131957
CG17036	0.101094	0.0501629	0.0509306
CG5781	0.0182203	0.0472421	-0.0290218
IFT43	0.170249	0.0754894	0.09476
CCT4	0.496298	0.469344	0.0269535
Nepl7	0	0	0
ACXB	0.0109283	0.00935678	0.00157157
ACXA	0.0132498	0.0168223	-0.00357247
ACXE	0	0	0
CG16800	0	0	0
Vha68-3	0.0169986	0.0572176	-0.040219
Tor	0.0947864	0.175842	-0.0810556
Ttc30	0.0124246	0.0897492	-0.0773246
A16	0.485862	0.530784	-0.0449215
CG9934	0.402198	0.321067	0.0811301
Yip1d1	0.659175	0.620586	0.0385888
CG5122	0.00861567	0.0502123	-0.0415966
Pk34A	0.0178977	0.027443	-0.00954536
kmg	0.0111981	0.00544293	0.00575517
Sirt1	0.499321	0.646767	-0.147446
CG5439	0.256347	0.257609	-0.00126103
CG5287	0.206196	0.184979	0.0212177
CG5458	0.114261	0.304773	-0.190512
Edem2	0.495711	0.437518	0.0581931
Pect	0.535657	0.395215	0.140442
mRF1	0.0941884	0.236526	-0.142338
CG16812	0.170081	0.325557	-0.155477
CG16813	0	0	0
CG16815	0	0	0
Prosalpha6T	0.0294279	0.0760038	-0.0465759
CG5867	0.330425	0.293792	0.0366323
CG5945	0.589829	0.871689	-0.28186
CG16820	0.186477	0.12171	0.0647674
Naa20B	0.0191457	0.0171207	0.00202499
Uvrag	0.145029	0.308484	-0.163456
CG31729	0.671571	0.594686	0.0768847
CG16825	0.0289308	0.0400515	-0.0111207
CG16826	0.97978	0.742616	0.237164
CG6523	0.30762	0.377092	-0.0694724
Tap42	0.233699	0.320565	-0.0868654
CG31855	0.348719	0.461566	-0.112847
CG6565	0.235073	0.497762	-0.262689
betaCOP	0.474277	0.570591	-0.096314
CG9302	0.116903	0.137665	-0.0207621
Bdp1	0.19961	0.643475	-0.443866
ND-B22	0.423273	0.483042	-0.059769
Nnp-1	0.140044	0.343584	-0.203539
CG9377	0.00429376	0	0.00429376
CG9395	0	0	0
Drep4	0.281705	0.262069	0.0196359
CG31848	0.0323463	0.0283348	0.00401152
CG31730	0.00771555	0.0789066	-0.0711911
Mabi	0	0	0
CG15480	0	0	0
Ski6	0.156244	0.289756	-0.133512
CG9426	0.227032	0.203317	0.0237144
kek4	0	0	0
CG15482	0.0216596	0.036541	-0.0148814
CG16972	0.210351	0.166054	0.0442968
CG16974	0.20679	0.200925	0.00586462
CG31849	0.00990567	0.0234031	-0.0134974
Sfmbt	0.27424	0.223816	0.0504239
DnaJ-H	0.607231	0.800185	-0.192955
CG16978	0.278389	0.285375	-0.00698618
CG9928	0.579793	0.63138	-0.0515872
CG7099	0.0378856	0.0696003	-0.0317148
CG7110	0.585197	0.616015	-0.0308182
CG16848	0	0.0284907	-0.0284907
Tehao	0	0	0
CG16852	0.033782	0.0439898	-0.0102078
CG16853	0.0145049	0.00733138	0.00717355
ics	0.744354	0.780904	-0.0365503
CG9254	0.0408458	0.238397	-0.197551
B4	0.325645	1.04633	-0.72069
CG9263	0	0	0
CG15638	0	0	0
Hsp60D	0	0.0184917	-0.0184917
Hacd2	0.449432	0.531731	-0.0822992
CG16956	0	0	0
Vm34Ca	0	0	0
CG10859	0.0139264	0.017421	-0.00349459
CG16957	0.0282072	0.0773003	-0.0490931
RpL24	1.44818	2.156	-0.707821
Ing5	0.451953	0.516573	-0.0646201
CG18507	0.0561254	0.138366	-0.0822408
Gpo3	0.0161917	0.0328015	-0.0166098
nur	0	0	0
TM9SF4	0.172608	0.401201	-0.228593
p38b	0.426282	0.56161	-0.135328
Eato	0.159927	0.0816812	0.0782459
CG16863	0.0502772	0.0234712	0.026806
Sec71	0.0686606	0.0222496	0.046411
CAH1	1.22098	0.935538	0.285445
CG16865	0.123956	0.115953	0.00800372
Sos	0.0738539	0.0437234	0.0301305
Orc5	0.0499309	0.0625541	-0.0126232
RpII33	0.222359	0.279019	-0.0566599
CenG1A	0.866717	1.6579	-0.791179
CG7916	0	0	0
CG7953	0	0	0
CG7968	0	0	0
Ance	0.490622	0.258573	0.232049
Ance-2	0	0	0
Acyp	0	0.0265566	-0.0265566
Vajk3	0.0079672	0.0166948	-0.00872758
Vajk1	0	0	0
Smg5	0.624778	0.597824	0.0269535
CG8997	0.250983	0.183181	0.0678021
CG33306	0.127755	0.176942	-0.0491875
CG33307	0.11584	0.129585	-0.0137449
Arpc1	0.425487	0.34433	0.0811566
tam	0.0428855	0.169224	-0.126338
CG16888	0.0346984	0.0951753	-0.0604769
Adat1	0.0430214	0.0375134	0.00550804
CG16890	0.143348	0.143129	0.000218311
CG9014	0.0141329	0.0841151	-0.0699822
DIP-kappa	0.0095482	0	0.0095482
NimB1	0.0657169	0.109564	-0.0438469
NimB5	0.211892	0.256219	-0.0443264
Cyp28a5	0.152728	0.150216	0.00251212
NimC2	0	0.00744568	-0.00744568
bgm	0.77925	0.230327	0.548923
nAChRalpha5	0.00692479	0	0.00692479
CG31769	0.157926	0.282137	-0.12421
CG15293	0.495805	0.651949	-0.156144
CG18095	0.10753	0.0849035	0.0226266
NimC3	0	0.0150765	-0.0150765
rk	0.00652631	0.0629736	-0.0564473
He	0	0	0
NimB4	0.106318	0.199375	-0.0930568
NimB2	0.18565	0.184428	0.00122158
CG32971	0	0	0
CG33090	0.170077	0.108103	0.0619742
CG15286	0	0	0
Rab14	0.161305	0.27207	-0.110764
Pgant35A	0.209728	0.327783	-0.118055
CG15283	0	0.0138792	-0.0138792
Cpr35B	0	0	0
elB	0.406707	0.34106	0.0656471
ppk	0.00810962	0.0081026	7.01776e-06
mTTF	0.213316	0.383204	-0.169888
noc	0.129208	0.114355	0.0148528
CG15282	0.033826	0	0.033826
CG3473	0.0459692	0.0943297	-0.0483605
CG31835	0	0	0
CG4691	0.0977822	0.276134	-0.178352
CSN1a	0.00642075	0.00992046	-0.00349972
CG4701	0.0552017	0.0283529	0.0268488
CG3491	0.0227673	0.00349758	0.0192697
ProtB	0.101313	0.32846	-0.227147
ProtA	0.126084	0.228021	-0.101936
CG15278	0.0255882	0.0839619	-0.0583736
CG4480	0.0300801	0.0506345	-0.0205544
CG15279	0.0672793	0.0422527	0.0250266
CG18420	0	0	0
CG4650	0	0	0
CG31775	0	0	0
DCTN5-p25	0.3158	0.341925	-0.0261243
NC2beta	0.321731	0.386491	-0.0647596
GABA-B-R1	0.0253865	0.0604875	-0.0351009
CG33310	0	0	0
yellow-c	0.0786038	0.200054	-0.121451
Su(H)	0.18528	0.173598	0.0116822
CG15270	0.0101879	0	0.0101879
CG15269	0	0	0
stc	0.203598	0.374625	-0.171027
dao	0.00498068	0	0.00498068
ZnT35C	0.0160809	0.0163383	-0.000257481
CG4168	0.0673507	0.0322743	0.0350764
vig	0.496514	0.569667	-0.0731529
TfIIS	0.250106	0.355405	-0.105299
ck	1.39499	1.01496	0.380027
CIAPIN1	0.560013	0.963739	-0.403727
CG31832	0.257262	0.161175	0.0960872
CG15263	0.325095	0.102288	0.222806
ms(2)35Ci	0.00407869	0.0648752	-0.0607965
CG15262	0.0429647	0	0.0429647
esg	0	0	0
CG4161	0	0.0407876	-0.0407876
sna	0	0	0
wor	0	0	0
CG15258	0.0130554	0.0303975	-0.0173422
nht	0.00486619	0.0129285	-0.00806227
CG15260	0.0141827	0.0536756	-0.0394929
CG15256	0.0329327	0.0564625	-0.0235298
kek3	0	0.00813019	-0.00813019
CG11865	0	0	0
CG7631	0.0206269	0.0272824	-0.00665554
CG18480	0.0253997	0.0627891	-0.0373894
CG18477	0	0	0
CG18478	0	0	0
CG31780	0	0	0
CG31827	0	0	0
Mtr4	0.143285	0.251372	-0.108087
CG3793	0.260492	0.311204	-0.0507125
CG31826	0.194104	0.139676	0.0544279
Ku80	0.0802739	0.28753	-0.207256
wek	0.0811121	0.12484	-0.0437277
Gli	0.120365	0.25274	-0.132374
ND-B17	0.192132	0.186151	0.00598093
CG4587	0.229521	0.109474	0.120047
Or35a	0	0	0
CG15253	0.0177786	0.0139074	0.00387126
CG15254	0.0337056	0.0650019	-0.0312963
Semp1	0.047522	0.0500911	-0.00256904
CG15255	0.151495	0.192449	-0.0409543
CG18109	0.00720301	0.0191134	-0.0119104
CG13243	0.00990567	0.0534573	-0.0435516
Tektin-A	0	0.0282835	-0.0282835
CG31735	0.00793498	0.114992	-0.107057
CG13244	0.0388738	0.0851102	-0.0462364
CG4793	0	0	0
CG12448	0.0369879	0.0589333	-0.0219454
CG18063	0.00651292	0.0175904	-0.0110775
CG10839	0.0248516	0.0931165	-0.0682649
beat-Ic	0.0311707	0.0376579	-0.00648717
CG13245	0	0	0
BicC	0	0	0
beat-Ia	0	0	0
CG31820	0.192296	0.248294	-0.0559978
beat-Ib	0	0	0
CG31821	0.027468	0.0208271	0.00664089
CG31823	0	0.0121706	-0.0121706
Tep1	0	0	0
CG7653	0	0.0160457	-0.0160457
CG18518	0.00859236	0.0220632	-0.0134708
CG4891	0.0230517	0.0482502	-0.0251985
CG4892	0	0.00476418	-0.00476418
CG31819	0.00773434	0.0121089	-0.00437457
EndoGI	0.429063	0.700806	-0.271743
CG4935	0.106754	0.092283	0.0144709
pkaap	0.147623	0.137297	0.0103259
CG17329	0.0319316	0.0467378	-0.0148062
Cyp303a1	0	0	0
CG17328	0.178649	0.0870877	0.091561
[truncated: 11,956 more rows]
